# Supplementary material for: Transcriptome and metabolite analysis identifies nitrogen utilization genes in tea plant (Camellia sinensis)
Source: PubMed Central journal article supplement (PMC5431998; doi:10.1038/s41598-017-01949-0), 2017-05-10
Supplement: 41598_2017_1949_MOESM1_ESM.pdf [file 41598_2017_1949_MOESM1_ESM.pdf]

## Transcriptome and metabolite analysis identifies nitrogen utilization genes in tea plant (*Camellia sinensis*)

Wei Li<sup>1, 2, 3†</sup>, Fen Xiang<sup>1†</sup>, Micai Zhong<sup>2</sup>, Lingyun Zhou<sup>1</sup>, Hongyan Liu<sup>1</sup>, Saijun Li<sup>1\*</sup>, and Xuwen Wang<sup>2, 4\*</sup>

### List of supplementary Information

- Figure S1. The gene ontology classification of unigenes in the *C. sinensis* variety HJ
- Figure S2. KEGG classification of unigenes in the *C. sinensis* variety HJ
- Figure S3. The top three enriched KEGG pathway of differentially expressed common genes in roots
- Table S1. Summary of RNA-seq reads and assembly in two *C. sinensis* varieties
- Table S2. Annotation summary of unigenes in *C. sinensis*
- Table S3. Shared differentially expressed genes in both the leaves and roots of the *C. sinensis* varieties in response to ammonium input
- Table S4. The involved KEGG pathways of common DEGs in *Camellia* roots
- Table S5. Primers for RT-qPCR

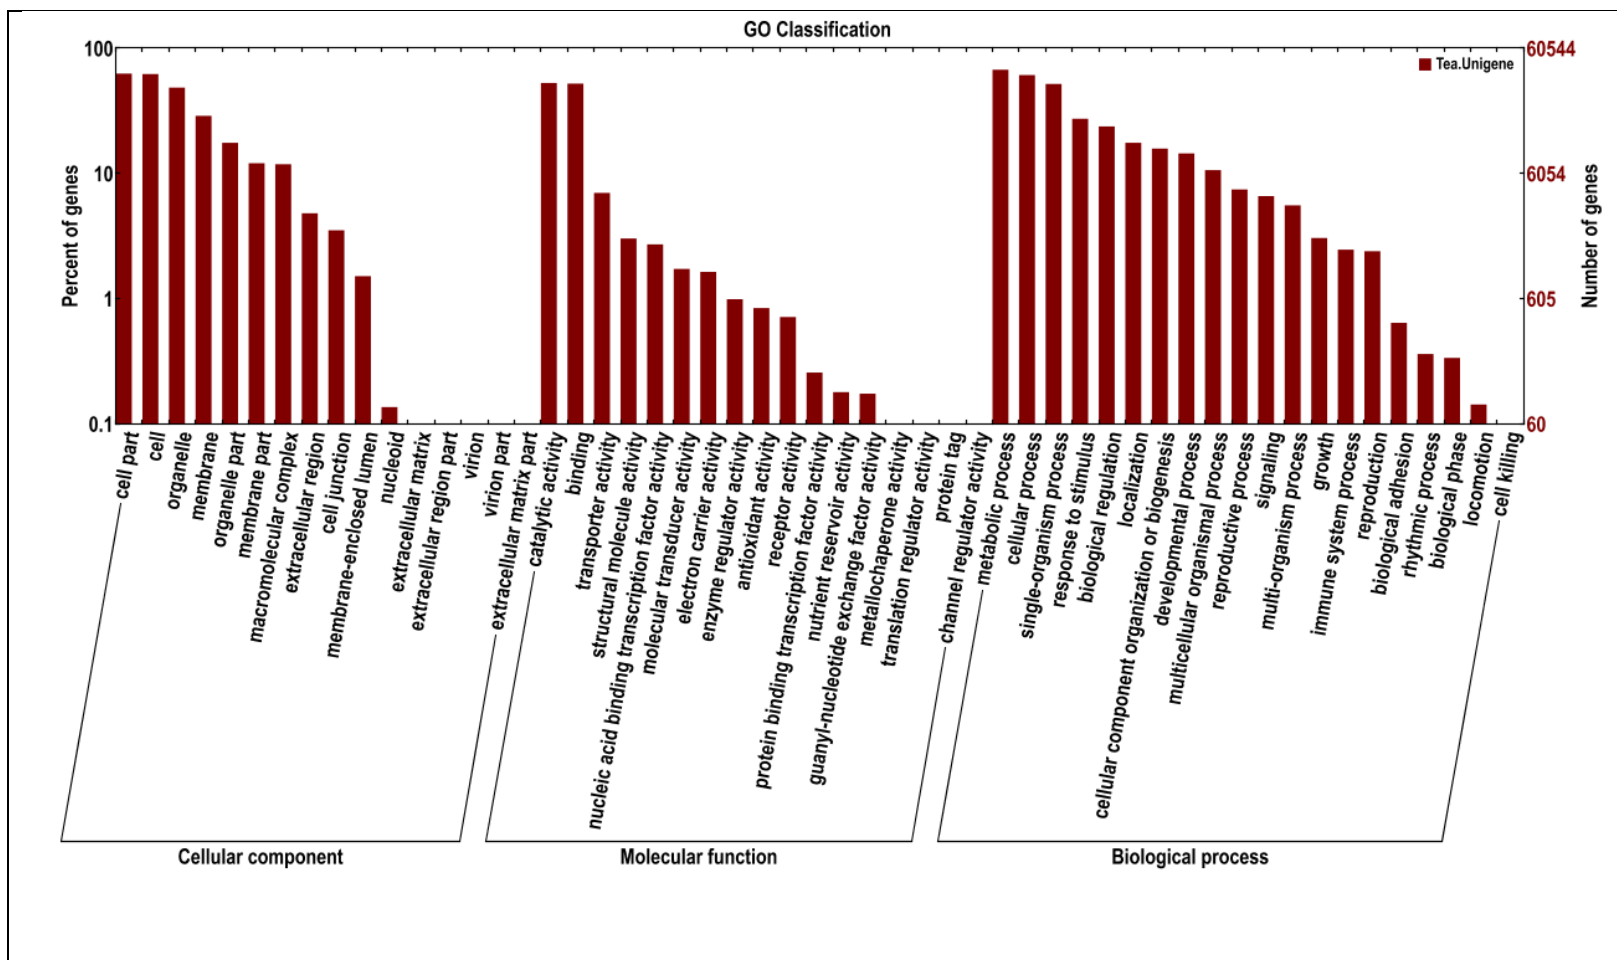

**Figure S1. Gene ontology classification of unigenes in *C. sinensis* HJ**

Abscissa represents the three major GO classes. The sub-classification was listed under the major categories. The ordinate represents the unigenes numbers in the right axis and the percentage of the total unigenes in the left axis.

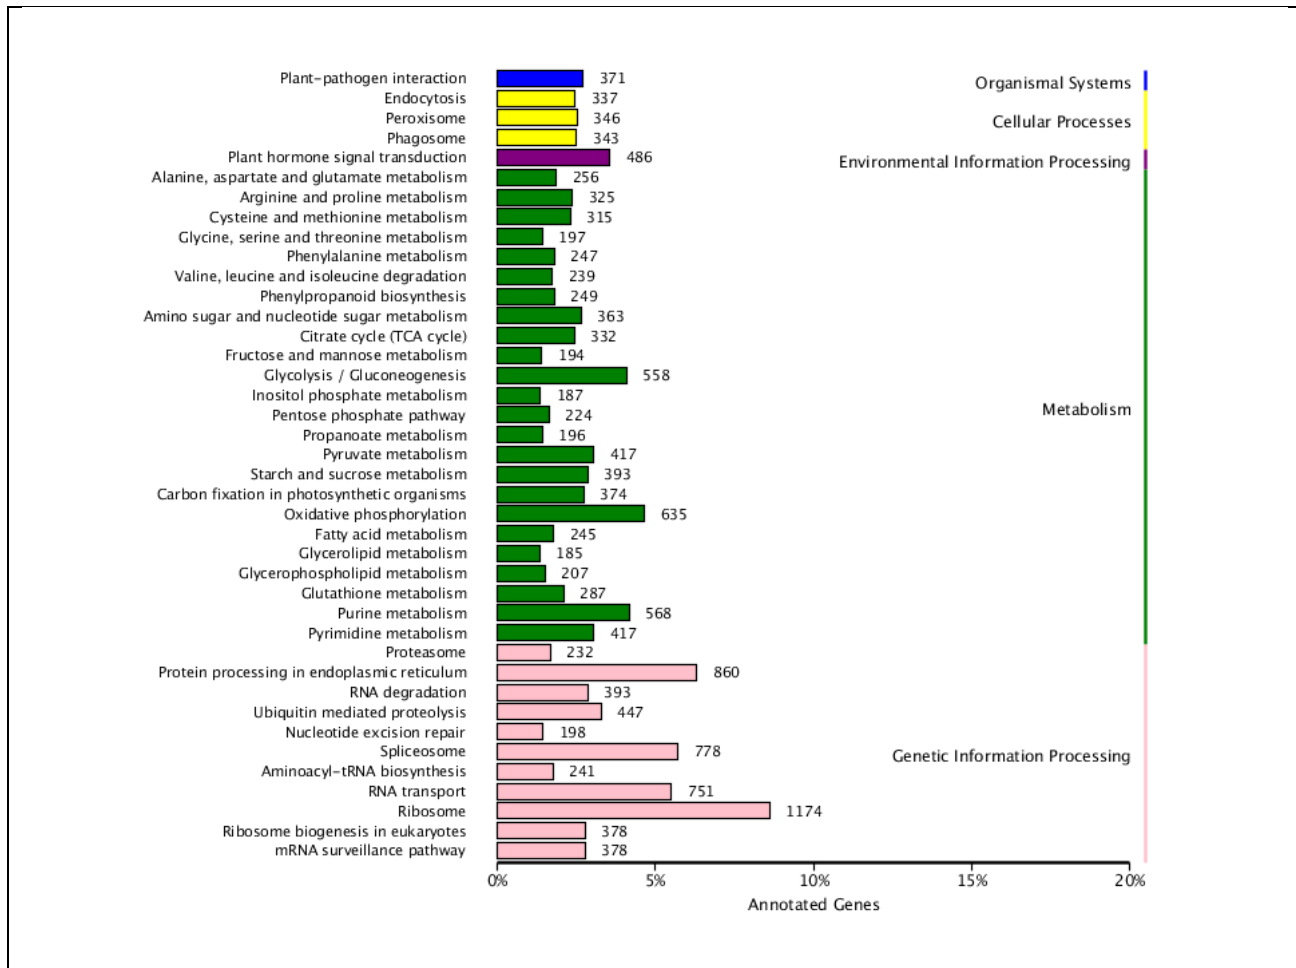

**Figure S2. KEGG classification of unigenes in *C. sinensis* variety HJ**

The five different colors represent the five categories of pathways. Each category is subdivided into several different classes. The vertical labels stand for the name of each pathway. The horizontal labels stand for the percentage of annotated pathway genes in the total number of unigenes annotated, and the number in the right of each bar is the number of unigenes in each pathway. The chart was generated for the top 40 pathways of the 118 total pathways.



**Table S1. Summary of RNA-seq reads and assembly in two *C. sinensis* varieties**

|                                | HJ          | FD          |
|--------------------------------|-------------|-------------|
| Total number of clean reads    | 100,232,165 | 102,115,437 |
| Number of transcripts          | 331,260     | 331,355     |
| Number of unigenes             | 194,519     | 198,118     |
| Total length of unigene (bp)   | 102,628,478 | 101,125,646 |
| Unigene N50 length (bp)        | 681         | 659         |
| Average length of unigene (bp) | 528         | 510         |

Data shows the statistical information of RNA-seq reads from Illumina Hiseq 2500 sequencing and assembly from software Trinity. The total number of clean reads is the sum of reads from both leaves and roots. HJ and FD represent *C. sinensis* varieties of Baojinghuangjin 1# and Fudingdabaicha, respectively.

**Table S2. Annotation summary of unigenes in *C. sinensis***

| databases     | HJ     |            | FD     |            |
|---------------|--------|------------|--------|------------|
|               | Number | Percentage | Number | Percentage |
| COG           | 25,159 | 12.93      | 25,940 | 13.09      |
| GO            | 60,544 | 31.12      | 52,026 | 26.26      |
| KEGG          | 19,389 | 9.97       | 18,157 | 9.16       |
| KOG           | 48,168 | 24.76      | 44,101 | 22.26      |
| Pfam          | 47,749 | 24.55      | 45,891 | 23.16      |
| Swiss-Prot    | 50,244 | 25.83      | 44,128 | 22.27      |
| NR            | 84,614 | 43.50      | 78,291 | 39.52      |
| all databases | 86,856 | 44.65      | 82,305 | 41.54      |

The above table shows the numbers and percentage of unigenes annotated in databases. The number shown in the last row was the total count of the annotated genes after removing duplicated unigenes.

**Table S3. Shared differentially expressed genes in both the leaves and roots of *C. sinensis* varieties in response to ammonium input**

| Gene ID          | Predicted function                                    |
|------------------|-------------------------------------------------------|
| c128107.graph_c0 | stress response                                       |
| c119942.graph_c3 | binding Manganese ion, nutrition storage              |
| c126564.graph_c2 | transcription factor, a gibberellin regulated protein |
| c95905.graph_c0  | aquaporin protein                                     |

**Table S4. The involved KEGG pathways of common DEGs in Camellia roots**  
(available in separate excel file)

**Table S5. Primers for RT-qPCR**

|    | <b>Gene ID</b>              | <b>Primer name</b> | <b>Primer sequence (5'--3')</b> |
|----|-----------------------------|--------------------|---------------------------------|
|    | Reference gene              | $\beta$ -actin1-F  | GCCATCTTTGATTGGAATGG            |
|    |                             | $\beta$ -actin1-R  | GGTGCCACAACCTTGATCTT            |
| HJ | c124953.graph_c1            | AMT.HJ.1F          | GAGCCAAACACCACCTTGTT            |
|    |                             | AMT.HJ.1R          | AGGCGGAGAAGAGGAGGTAG            |
|    | c112070.graph_c0            | NRT.HJ.1F          | TTGGCCAACGTACATGAAAA            |
|    |                             | NRT.HJ.1R          | GATCCGGTTGTGAGCAGAAT            |
|    | c95905.graph_c0             | AQP.HJ.1F          | TGTTGGCACCCACTATGAAA            |
|    |                             | AQP.HJ.1R          | TCCGGTGTGACAGTATGGAA            |
| FD | c94357.graph_c0             | GS.HJ.2F           | AGATCATTGAGGCCATCGAG            |
|    |                             | GS.HJ.2R           | ACGACGTATGGGTCCATGTT            |
|    | c114054.graph_c0            | GOGAT.HJ.F         | CAACATGGGCTTCGATCAGG            |
|    |                             | GOGAT.HJ.R         | TTGCTGCTGGTATGACTGGA            |
|    | c115533.graph_c0            | AMT.FD.F           | CAAAACCCAAGCTGACACGA            |
|    |                             | AMT.FD.R           | AGCCGCACTTACTACCTTGT            |
|    | c137324.graph_c0            | NRT.FD.F           | TTGGAGGAAAAGAGGGGCAT            |
|    |                             | NRT.FD.R           | GGGAAATGGTGCCGGAAAAT            |
|    | c68483.graph_c0(Same as HJ) | AQP.FD.1F          | TGTTGGCACCCACTATGAAA            |
|    |                             | AQP.FD.1R          | TCCGGTGTGACAGTATGGAA            |
|    | c104005.graph_c0            | GS.FD.F            | CCCGACTGTTGGCATTTCCTG           |
|    |                             | GS.FD.R            | CCTCATCGACTCGGTACTGT            |
|    | c133242.graph_c0            | GOGAT.FD.F         | CAACATGGGCTTCGATCAGG            |
|    |                             | GOGAT.FD.R         | TTGCTGCTGGTATGACTGGA            |
